# Supplementary material
Source: MDPI journal article supplement (https://www.mdpi.com/2073-4395/13/8/2078)
Supplement: s1 [file s1]

## Supplementary Materials

**Table S1.** Primer sequences of the genes and PCR conditions used in this study

| Genes          | Encoded protein                               |   | Primer sequences (5'-3')  |
|----------------|-----------------------------------------------|---|---------------------------|
| <i>MdPAL</i>   | Phenylalanine ammonialyase                    | F | TTCCTTGGCAACCCTGTCAC      |
|                |                                               | R | ATGTCGACCGCCTCAAAGG       |
| <i>MdCHS</i>   | Chhalcone synthase                            | F | GGACTGGAAC TCACTCTTC      |
|                |                                               | R | GCCGTAATCTGACAACAC        |
| <i>MdCHI</i>   | Chalcone isomerase                            | F | AGGATCACTAACGATCAGCTTCTCT |
|                |                                               | R | TGGCCAAACTTTGCTTTGCTG     |
| <i>MdF3H</i>   | Flavanone-3-hydroxylase                       | F | CCAAGCAGTGGTGAAC TC       |
|                |                                               | R | CTTCTCTCCCTCCCTCAC        |
| <i>MdDFR</i>   | Dihydroflavonol 4-reductase                   | F | AAGCCTCATCACTGGACT        |
|                |                                               | R | ATGTGAGAAAGGCAGAGG        |
| <i>MdANS</i>   | Anthocyanidin synthase                        | F | GCTGGAGAAAGAAGTTGG        |
|                |                                               | R | GGAGGATGAAGGTGAGTG        |
| <i>MdUFGT</i>  | UDP-glucose: flavonoid-3-Oglucosyltransferase | F | CAACATCCAAGGTCTCTC        |
|                |                                               | R | GTCCCATCTGAAGTAGCA        |
| <i>MdMYB10</i> | R3R3 myb-type transcript factor               | F | TCATCTCTCTACTGCAGTGCCTA   |
|                |                                               | R | CCAGAAAGACACCTTAGACCTTCG  |

PCR conditions were as follows: 95 °C for 5 min, followed by 40 cycles at 95 °C for 10s, 60 °C for 15s, and 72 °C for 12s, melting curve analysis was performed at 65-95 °C.
